# Supplementary material for: The FireWork v2.0 air quality forecast system with biomass burningemissions from the Canadian Forest Fire Emissions Prediction Systemv2.03
Source: Copernicus journal article supplement (doi:10.5194/gmd-2019-63), 2019-03-25
Supplement: Supplementary file 1 [file gmd-2019-63-supplement.pdf]

## Supplementary Material for:

# The FireWork v2.0 air quality forecast system with biomass burning emissions from the Canadian Forest Fire Emissions Prediction System

5 **v2.03**

Jack Chen<sup>1</sup>, Kerry Anderson<sup>2+</sup>, Radenko Pavlovic<sup>3</sup>, Michael D. Moran<sup>1</sup>, Peter Englefield<sup>2</sup>, Dan K. Thompson<sup>2</sup>, Rodrigo Munoz-Alpizar<sup>3</sup>, and Hugo Landry<sup>3</sup>

<sup>1</sup> Air Quality Research Division, Environment and Climate Change Canada, Ontario, Canada

<sup>2</sup> Canadian Forest Service, Natural Resources Canada, Alberta, Canada

10 <sup>3</sup> Air Quality Modelling Applications Section, Environment and Climate Change Canada, Quebec, Canada

<sup>+</sup>Emeritus

*Correspondence to: Jack Chen (jack.chen@canada.ca)*

## 15 **S1. Reference material**

**Table S1. List of acronyms.**

|        |                                                 |
|--------|-------------------------------------------------|
| AOD    | Aerosol Optical Depth                           |
| APEI   | Air Pollutant Emissions Inventory (Canada)      |
| AQ     | Air Quality                                     |
| AQHI   | Air Quality Health Index                        |
| AQS    | Air Quality System measurement network (U.S.)   |
| AVHRR  | Advanced Very High Resolution Radiometer        |
| CAM    | Canadian Aerosol Module                         |
| CFB    | Crown Fraction Burned                           |
| CFC    | Crown Fuel Consumption                          |
| CFFDRS | Canadian Forest Fire Danger Rating System       |
| CFFEPS | Canadian Forest Fire Emission Prediction System |
| CFS    | Canadian Forest Service                         |
| CSI    | Critical Success Index                          |
| CTM    | Chemical Transport Model                        |
| CWFIS  | Canadian Wildland Fire Information System       |
| ECAN   | Eastern Canada Region                           |
| ECCC   | Environment Climate Change Canada               |
| EPA    | Environmental Protection Agency (U.S.)          |
| EUSA   | Eastern USA Region                              |
| FAR    | False Alarm Rate                                |
| FBP    | Canadian Forest Fire Behavior Prediction System |
| FEPS   | Fire Emission Production Simulator (USFS)       |
| FFMC   | Fine Fuel Moisture Code                         |

|          |                                                                            |
|----------|----------------------------------------------------------------------------|
| FRP      | Fire Radiative Power                                                       |
| FWI      | Canadian Forest Fire Weather Index System                                  |
| GEM      | Global Environmental Multiscale numerical weather prediction model         |
| GEM-MACH | Global Environmental Multi-scale Modelling Air quality and Chemistry model |
| GOES     | Geostationary Operational Environmental Satellite                          |
| GTAC     | Geospatial Technology and Applications Center                              |
| HFI      | Head Fire Intensity                                                        |
| LST      | Local Standard Time                                                        |
| MB       | Mean Bias                                                                  |
| MODIS    | Moderate Resolution Imaging Spectroradiometer                              |
| NAPS     | National Air Pollution Surveillance network (Canada)                       |
| NASA     | National Aeronautics and Space Administration (U.S.)                       |
| NEI      | National Emissions Inventory (U.S.)                                        |
| NMHC     | Non-Methane Hydrocarbon                                                    |
| NOAA     | National Oceanic and Atmospheric Administration (U.S.)                     |
| NRT      | Near-Real-Time                                                             |
| NWP      | Numerical Weather Prediction                                               |
| NWS      | National Weather Service (U.S.)                                            |
| PBL      | Planetary Boundary Layer                                                   |
| PM       | Particulate Matter                                                         |
| POD      | Probability of Detection                                                   |
| R        | Pearson Correlation Coefficient                                            |
| RAQDPS   | Regional Air Quality Deterministic Prediction System (Canada)              |
| RMSE     | Root-mean-square Error                                                     |
| ROS      | Rate of Spread                                                             |
| SFC      | Surface Fuel Consumption                                                   |
| TFC      | Total Fuel Consumption                                                     |
| USFS     | United States Forest Service                                               |
| UTC      | Coordinated Universal Time                                                 |
| VCD      | Vertical Column Density                                                    |
| VIIRS    | Visible Infrared Imaging Radiometer Suite                                  |
| VOC      | Volatile organic compound                                                  |
| WCAN     | Western Canada Region                                                      |
| WUSA     | Western USA Region                                                         |

**Table S2. Details of NAPS measurement stations in the Northern-Canada Region (see Figure 1 for a plot of station locations).**

| <b>Station ID</b> | <b>Name and Province/Territory</b> | <b>Latitude, Longitude</b> |
|-------------------|------------------------------------|----------------------------|
| 000129003         | Yellowknife, NT                    | 62.452084, -114.364031     |
| 000129601         | Fort Smith, NT                     | 60.004486, -111.893377     |
| 000129203         | Inuvik, NT                         | 68.35702, -133.7141        |
| 000080402         | 63 - 12th Street East, SK          | 53.201694, -105.7520       |
| 000080211         | Saskatoon, SK                      | 52.13613, -106.66293       |
| 000080110         | Regina, SK                         | 50.45017, -104.61722       |
| 000070203         | Assiniboine College, MB            | 49.84225, -99.919          |
| 000070118         | Winnipeg Pump Station, MB          | 49.93229, -97.11327        |
| 000070119         | Ellen Street, MB                   | 49.89795, -97.14665        |
| 000060808         | Thunder Bay, ON                    | 48.3794, -89.2902          |

## S2. Additional model evaluation material for the 2017 fire season

Table S3. Model performance statistics for daily maximum surface O<sub>3</sub> volume mixing ratio (ppbv) for the Aug. 1 to Sept. 18, 2017 period for measurement stations in the AB+BC, ID+MT+OR+WA, and Northern-Canada regions.

| O <sub>3</sub> | AB+BC (64 stations) |            |               | ID+MT+OR+WA (25 stations) |            |           | Northern-Canada (10 stations) |            |           |
|----------------|---------------------|------------|---------------|---------------------------|------------|-----------|-------------------------------|------------|-----------|
| Model          | RAQDPS              | FW-<br>Ops | FW-<br>CFFEPS | RAQDPS                    | FW-<br>Ops | FW-CFFEPS | RAQDPS                        | FW-<br>Ops | FW-CFFEPS |
| count          | 3131                |            |               | 1220                      |            |           | 389                           |            |           |
| $\bar{O}$      | 41                  |            |               | 57                        |            |           | 33                            |            |           |
| $\bar{M}$      | 48                  | 71         | 51            | 60                        | 90         | 64        | 37                            | 41         | 37        |
| MB             | 7                   | 30         | 9             | 4                         | 33         | 8         | 4                             | 9          | 5         |
| R              | 0.55                | 0.37       | 0.55          | 0.70                      | 0.36       | 0.67      | 0.73                          | 0.61       | 0.71      |
| RMSE           | 19                  | 68         | 22            | 18                        | 78         | 21        | 9                             | 15         | 9         |

5 Table S4. O<sub>3</sub> categorical scores based on a threshold of 65 ppbv for the Aug. 1 to Sept. 18, 2017 period for measurement stations in the AB+BC, ID+MT+OR+WA, and Northern-Canada regions.

| O <sub>3</sub> | AB+BC  |            |               | ID+MT+OR+WA |            |               | Northern-Canada |            |               |
|----------------|--------|------------|---------------|-------------|------------|---------------|-----------------|------------|---------------|
| Model          | RAQDPS | FW-<br>Ops | FW-<br>CFFEPS | RAQDPS      | FW-<br>Ops | FW-<br>CFFEPS | RAQDPS          | FW-<br>Ops | FW-<br>CFFEPS |
| POD            | 54%    | 84%        | 67%           | 53%         | 83%        | 65%           | Inf.            | Inf.       | Inf.          |
| FAR            | 85%    | 94%        | 88%           | 52%         | 74%        | 58%           | 100%            | 100%       | 100%          |
| CSI            | 13%    | 6%         | 11%           | 34%         | 25%        | 34%           | 0%              | 0%         | 0%            |

10 Table S5. Model performance statistics for daily maximum surface NO<sub>2</sub> volume mixing ratio (ppbv) for the Aug. 1 to Sept. 18, 2017 period for measurement stations in the AB+BC, ID+MT+OR+WA, and Northern-Canada regions. Note that there is only one measurement station (in Oregon) for the ID+MT+OR+WA region.

| NO <sub>2</sub> | AB+BC (71 stations) |            |               | ID+MT+OR+WA (1 station in OR) |        |           | Northern-Canada (10 stations) |            |           |
|-----------------|---------------------|------------|---------------|-------------------------------|--------|-----------|-------------------------------|------------|-----------|
| Model           | RAQDPS              | FW-<br>Ops | FW-<br>CFFEPS | RAQDPS                        | FW-Ops | FW-CFFEPS | RAQDPS                        | FW-<br>Ops | FW-CFFEPS |
| count           | 3477                |            |               | 46                            |        |           | 342                           |            |           |
| $\bar{O}$       | 14                  |            |               | 17                            |        |           | 10                            |            |           |
| $\bar{M}$       | 20                  | 22         | 20            | 41                            | 47     | 42        | 15                            | 15         | 15        |
| MB              | 7                   | 8          | 7             | 24                            | 29     | 24        | 5                             | 5          | 5         |
| R               | 0.59                | 0.58       | 0.59          | 0.53                          | 0.57   | 0.54      | 0.44                          | 0.44       | 0.45      |
| RMSE            | 15                  | 18         | 15            | 30                            | 37     | 31        | 11                            | 11         | 11        |

Table S6. NO<sub>2</sub> categorical scores based on a threshold of 30 ppbv for the Aug. 1 to Sept. 18, 2017 period for measurement stations in the AB+BC, ID+MT+OR+WA, and Northern-Canada regions. Note that there is only one measurement station (in Oregon) for the ID+MT+OR+WA region.

| NO <sub>2</sub> | AB+BC  |            |               | ID+MT+OR+WA (1 station in OR) |            |           | Northern-Canada |            |               |
|-----------------|--------|------------|---------------|-------------------------------|------------|-----------|-----------------|------------|---------------|
| Model           | RAQDPS | FW-<br>Ops | FW-<br>CFFEPS | RAQDPS                        | FW-<br>Ops | FW-CFFEPS | RAQDPS          | FW-<br>Ops | FW-<br>CFFEPS |
| POD             | 47%    | 46%        | 47%           | 89%                           | 89%        | 89%       | 7%              | 7%         | 12%           |
| FAR             | 91%    | 92%        | 91%           | 69%                           | 73%        | 70%       | 98%             | 98%        | 97%           |
| CSI             | 8%     | 7%         | 8%            | 30%                           | 26%        | 29%       | 1%              | 1%         | 3%            |

15

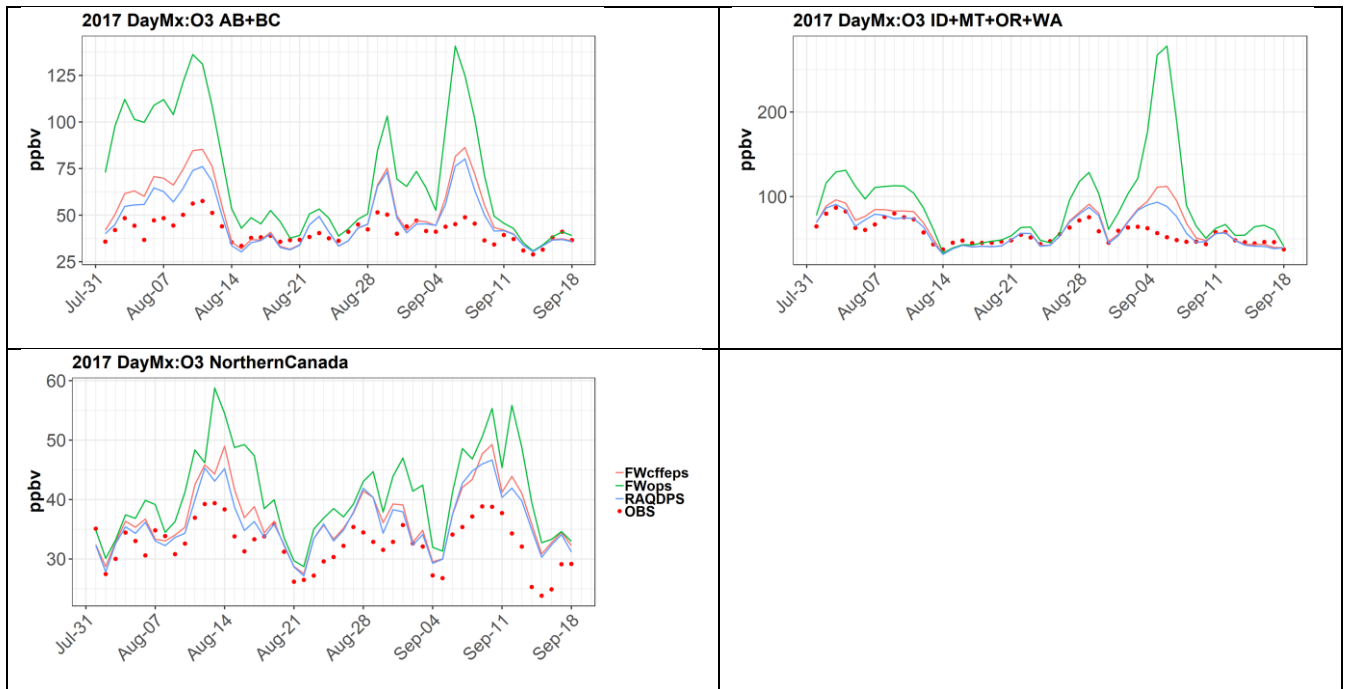

Figure S1. Time series of mean daily maximum O<sub>3</sub> volume mixing ratio (ppbv) from Aug. 1 to Sept. 18, 2017 for the three forecast models and surface measurements (OBS) averaged across measurement stations in the AB+BC, ID+MT+OR+WA, and Northern-Canada regions.

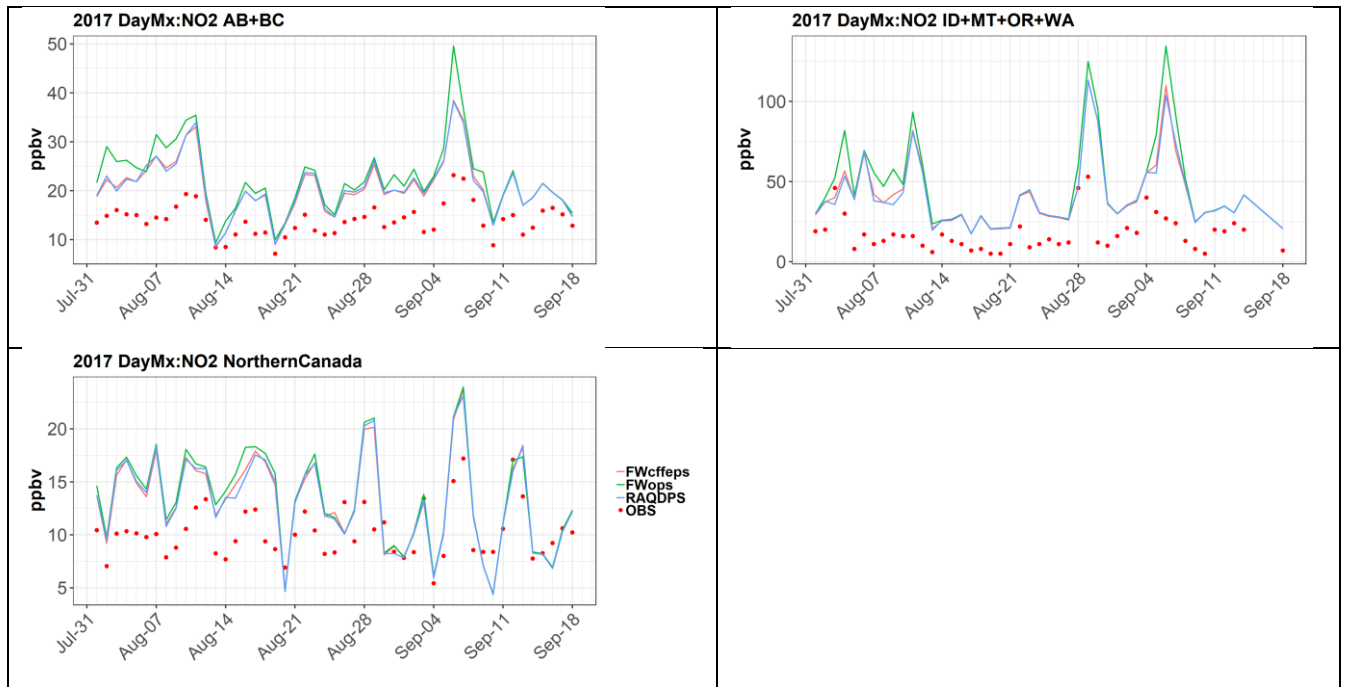

5 Figure S2. Time series of mean daily maximum NO<sub>2</sub> volume mixing ratio (ppbv) from Aug. 1 to Sept. 18, 2017 the three forecast models and surface measurements (OBS) averaged across measurement stations in AB+BC, ID+MT+OR+WA and Northern-Canada regions

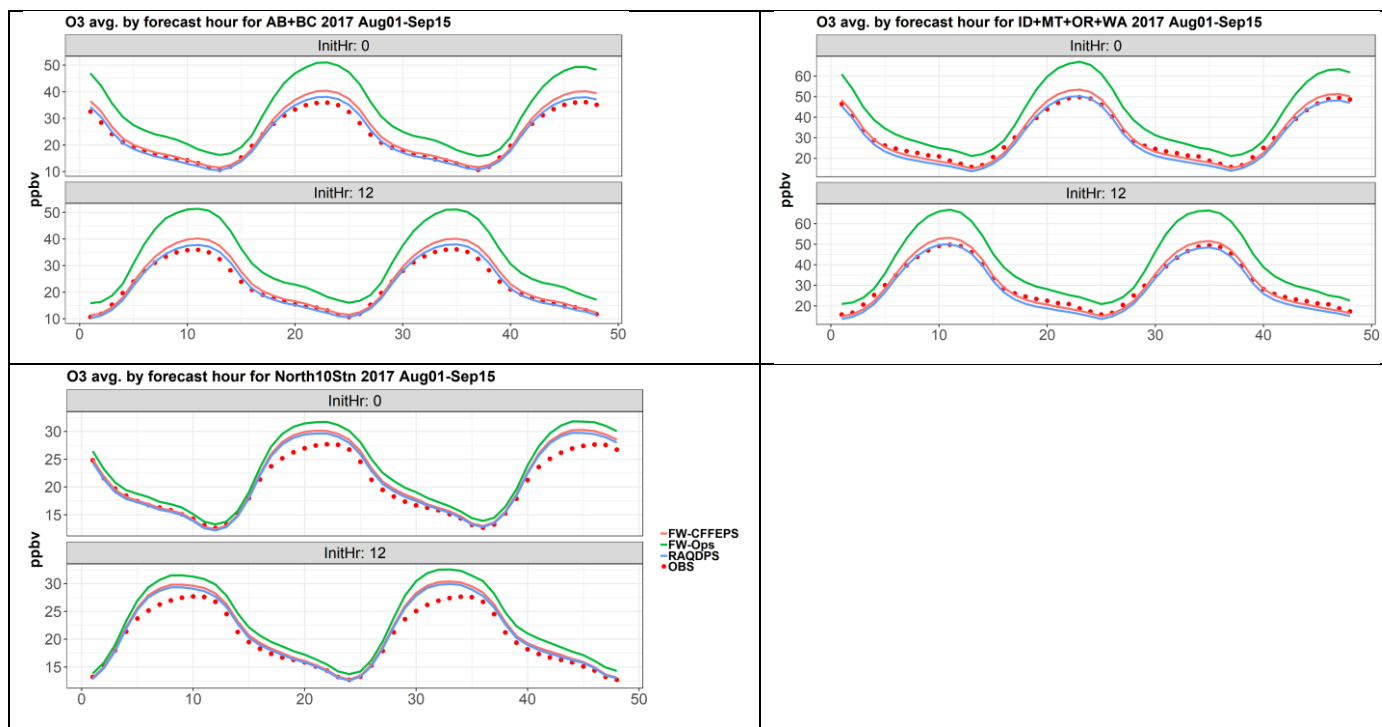

**Figure S3. Mean O<sub>3</sub> volume mixing ratio (ppbv) by forecast hour (f00-f48) for the period from Aug. 1 to Sept. 16, 2017 for the three forecast models and surface measurements (OBS) for measurement stations in the AB+BC, ID+MT+OR+WA, and Northern-Canada regions.**

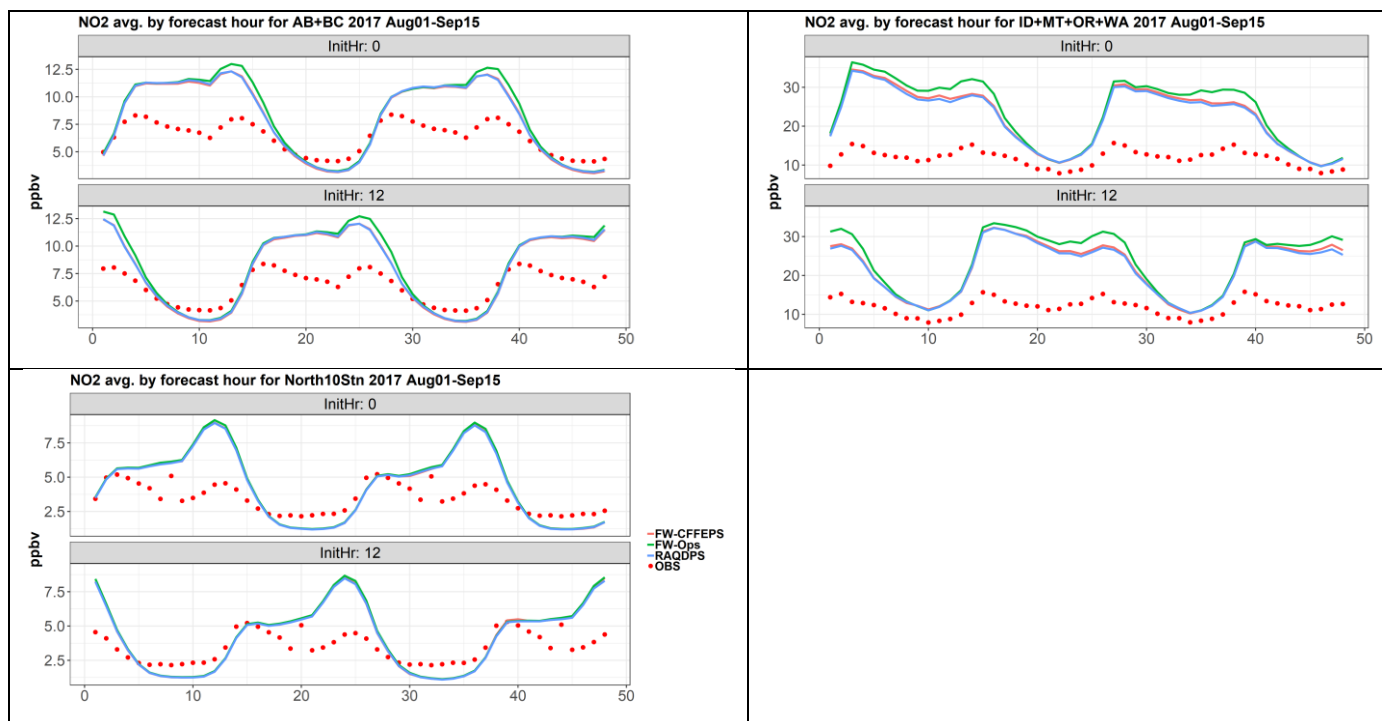

**5 Figure S4. Mean NO<sub>2</sub> volume mixing ratio (ppbv) by forecast hour (f00-f48) from Aug. 1 to Sept. 16, 2017 for the three forecast models and surface measurements (OBS) for measurement stations in the AB+BC, ID+MT+OR+WA and Northern-Canada regions.**

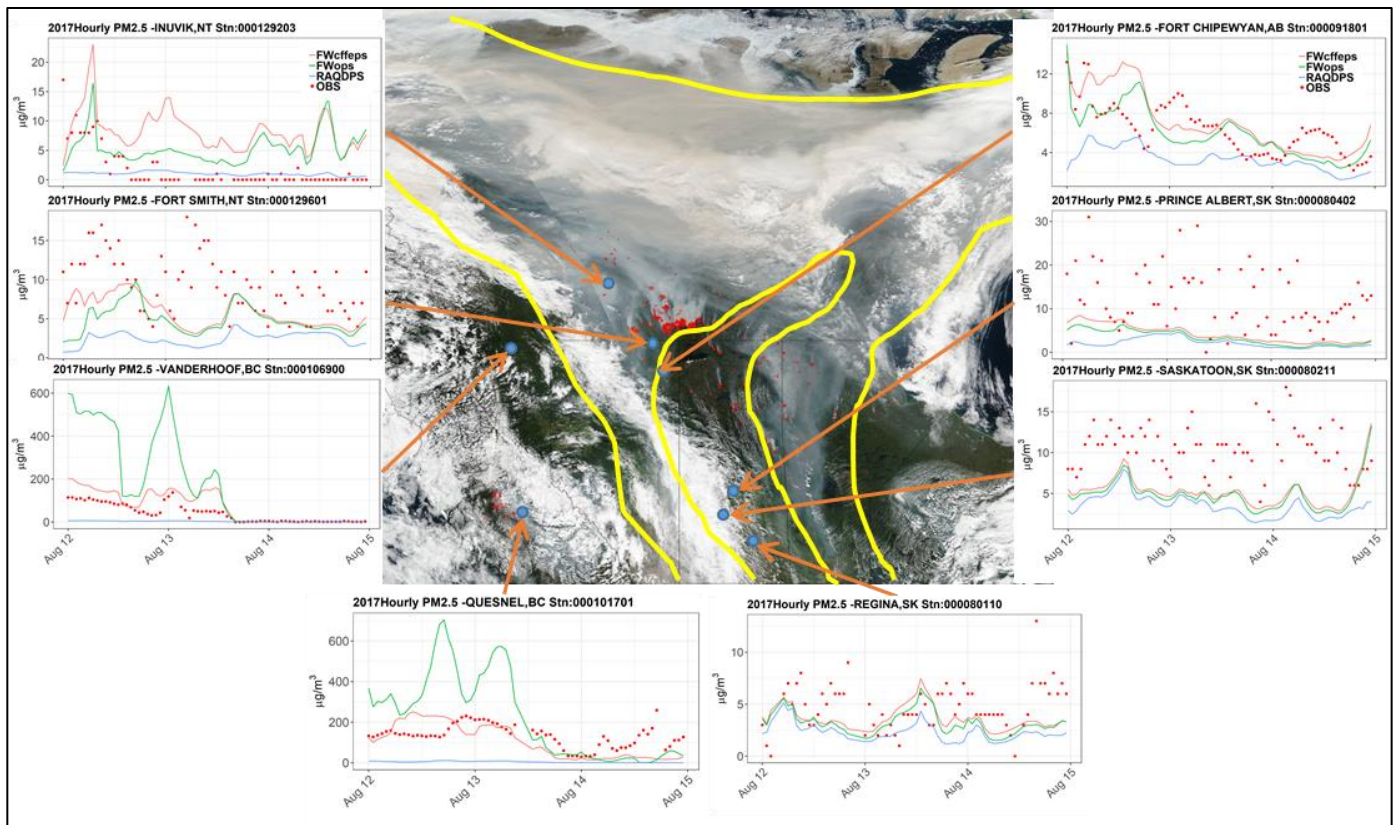

Figure S5. Time series of hourly surface PM<sub>2.5</sub> concentrations ( $\mu\text{g m}^{-3}$ ) from Aug. 12–15, 2017 for three model simulations and measurements (OBS) for selected stations with station locations identified by red arrows, and (centre) VIIRS true colour satellite image for Aug. 13, 2017 with yellow lines superimposed to aid comparison. Fire hotspots are represented in red dots in VIIRS image. VIIRS image source: NASA <https://www.nasa.gov/image-feature/goddard/2017/smoke-and-clouds-obscure-skies-in-northern-canada>

5

### S3. Model Forecast Evaluation for the 2018 Fire Season

Similar to the model forecast evaluation for the 2017 fire season presented in Section 3.1, model outputs from FireWork-CFFEPS (FireWork v2.0) and FireWork-Ops (FireWork v1.0) were analysed and benchmarked against RAQDPS for the 2018 season. FireWork-CFFEPS was run in hindcast mode with the same forecast configuration as FireWork-Ops for three months (July to August) in 2018 that covered periods of high wildfire activity in Canada.

2018 was an extreme year for fire activity in Canada. Most fires occurred in BC in August but there was some activity in eastern Canada earlier in the summer. Figure S6 shows the Canada-wide weekly burned area starting in May 1, 2018 compared to the 10-year average. The last three weeks of August 2018 stand out for higher-than-average fire activity.

The  $PM_{2.5}$  contribution from fire emissions (fire- $PM_{2.5}$ ), both primary and secondary, can be derived from the difference in model output between RAQDPS and FireWork during the same time period. (Figure S7) shows monthly mean forecast surface fire- $PM_{2.5}$  concentrations from FireWork-CFFEPS and FireWork-Ops for the 2018 fire season, with the contribution from fire- $PM_{2.5}$  dominating near areas of fire activity. Similar to the analysis for the 2017 fire season (Figure 7), there are generally lower surface concentrations near areas of hotspot sources but overall larger spatial distributions of lower level  $PM_{2.5}$  concentrations for FireWork-CFFEPS compared to FireWork-Ops.

Daily maximum hourly model forecast surface concentrations for  $PM_{2.5}$ ,  $O_3$ , and  $NO_2$  were analysed against available hourly surface measurements from the Canadian NAPS network and the U.S. AQS network. The number of available measurement stations and their distribution across the model domain are indicated in Figure S8. Model results are paired by forecast time and by the grid cell enclosing the station location. Only stations with greater than >75% measurement completeness were included. Most of the measurement stations are located in urban and suburban areas with high population density. Also, most of the NAPS network stations have co-located measurements for all three pollutants whereas there are comparatively fewer stations in the U.S. AQS network that measure  $NO_2$ .

Model forecast performance statistics and categorical scores were calculated for stations across the four large geographic regions (WCAN, ECAN, WUSA, EUSA) shown in Figure 1 and separately for stations within the two westernmost Canadian provinces (BC, AB) and two western U.S. states (WA, MT) that were strongly impacted by fire emissions during the fire season. Table S7 provides a comparison of forecast statistics for FireWork-CFFEPS and FireWork-Ops with the RAQDPS. Table S8 provides a similar comparison of categorical scores for the same concentration threshold levels that were used in the 2017 evaluation analysis:  $PM_{2.5}$  threshold of  $30 \mu g m^{-3}$ ,  $O_3$  threshold of 65 ppbv, and  $NO_2$  threshold of 30 ppbv. Similar to the results shown in Section 3.1 for 2017, FireWork also outperforms the RAQDPS for  $PM_{2.5}$  and FireWork-CFFEPS outperforms FireWork-Ops in 2018. Figure S9 and Figure S10 show time series of mean daily maximum  $PM_{2.5}$ ,  $O_3$ , and  $NO_2$  abundances over the three months averaged over stations within two western Canadian provinces (AB, BC) and two western U.S. states (MT, WA). The FireWork-CFFEPS time series generally reduce pollutant over-predictions associated with FireWork-Ops while at the same time capturing fire contributions to  $PM_{2.5}$  that are missed by the RAQDPS. The number of stations used to calculate the averages as well as selected model evaluation statistics over the three-month period are also listed within the two figures.

Model performance by forecast hour in terms of diurnal variability predicted by the three forecast systems for the stations in the two regions (AB+BC and MT+WA) are presented in Figure S11. Similar to Figure 9, Figure S3 and Figure S4, modelled and measured surface  $PM_{2.5}$ ,  $O_3$  and  $NO_2$  were paired and averaged by forecast hour (f00-f48) over all stations within the region during period of high fire activity from Aug. 13 to Aug. 26 2018. As with the evaluation for 2017, there are improvements to  $O_3$  hourly



variability with FireWork-CFFEPS compared to FireWork-Ops, and minimal changes to NO<sub>2</sub> concentrations. However, unlike the 2017 evaluation, the hourly forecast performance for PM<sub>2.5</sub> is under-predicted with FireWork-CFFEPS, and the concentration ranges were better represented with FireWork-Ops. Upon further analysis, this is due to effects of averaging over periods of under-prediction in both FireWork systems (Aug. 13-20 2018), together with periods of large over-predictions in the FireWork-Ops system (Aug. 20-26 2017). The compensation of forecast PM<sub>2.5</sub> errors in the FireWork-Ops system resulted in the overall better diurnal average compared to FireWork-CFFEPS. This can be observed from examples of station specific hourly PM<sub>2.5</sub> concentrations time series comparisons from AB and BC in Figure S12.

Similar to Section 3.1.5, fire-PM<sub>2.5</sub> VCD fields (g m<sup>-2</sup>) from the FireWork-CFFEPS and FireWork-Ops forecasts were subjectively compared against NASA's VIIR-true-colour image for a case study. Figure S13 shows the 24-hour forecast fire-PM<sub>2.5</sub> VCD field from the FireWork-Ops and FireWork-CFFEPS simulations from the Aug. 22 12 UTC simulation, valid at Aug. 23 12 UTC. These fields are compared against a VIIRS true colour satellite image for Aug. 23, 2018. A visual comparison reveals lower PM<sub>2.5</sub> VCD near fire hotspots, but in general a more widespread spatial distribution for FireWork-CFFEPS compared to FireWork-Ops. Figure S14 shows a quantitative comparison of hourly surface PM<sub>2.5</sub> concentration time series over the same period (Aug. 22-25) from selected stations across Canada. Forecast concentrations were well represented from FireWork-CFFEPS for stations in the west, near sources of fire hotspots. However, surface PM<sub>2.5</sub> concentrations were generally under-predicted for stations further downwind of the fire hotspots in Ontario and Quebec, though with FireWork-CFFEPS showing slightly higher forecast concentrations than FireWork-Ops.

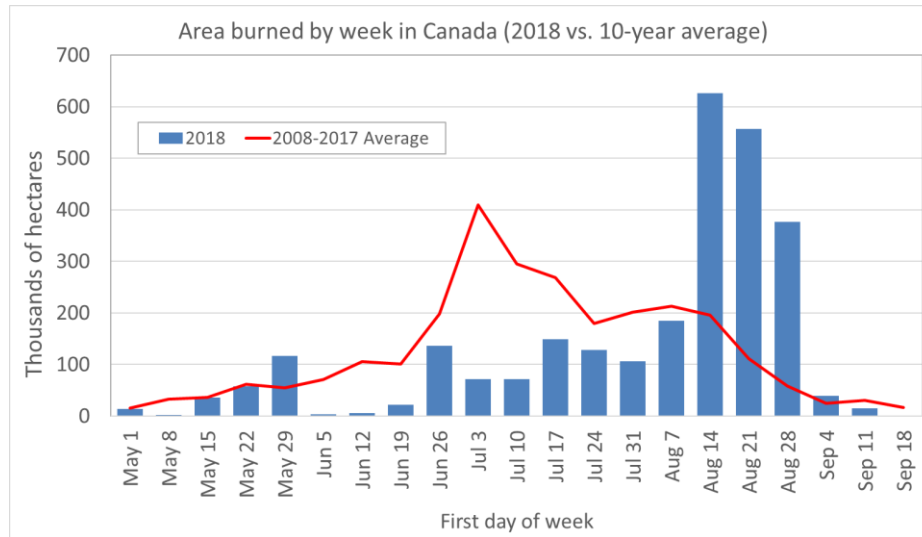

20 **Figure S6. National fire burn area in Canada by week for 2018 fire season (blue vertical bars) and previous 10-year average (red line).**

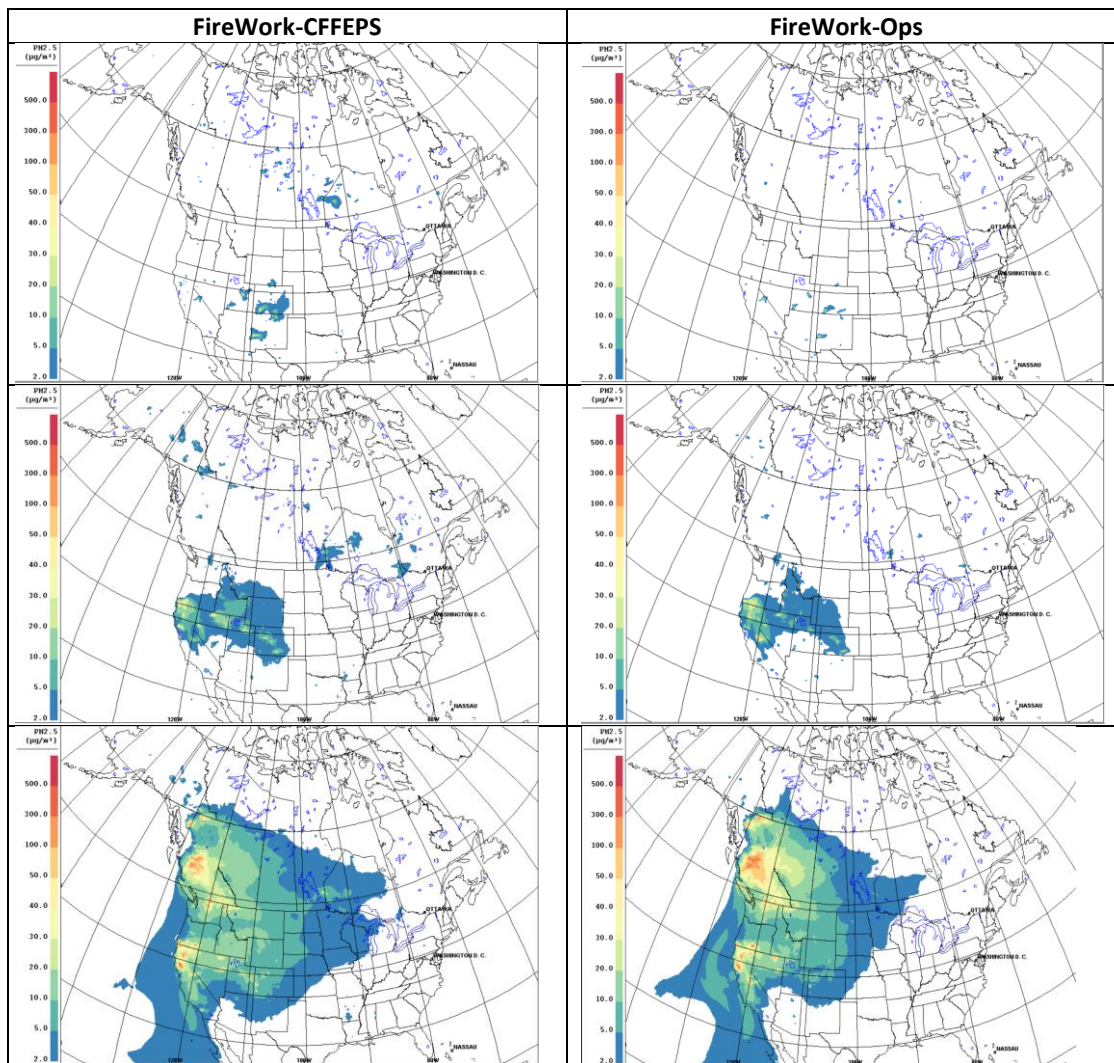

**Figure S7. Mean monthly surface fire-PM<sub>2.5</sub> concentrations ( $\mu\text{g m}^{-3}$ ) from FireWork-CFFEPS (left) and FireWork-Ops (right) for June (top row), July (middle row), and August (bottom row) 2018.**

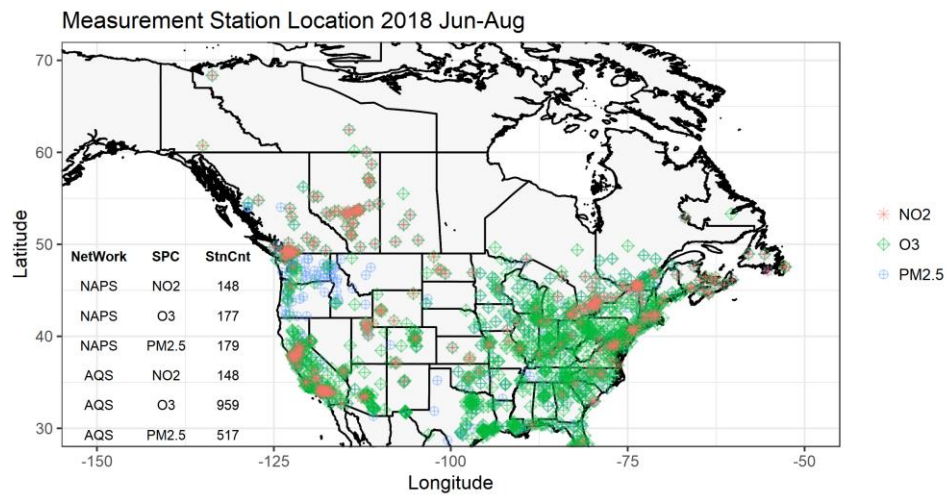

**Figure S8. Locations of Canadian NAPS and U.S. AQS stations used for 2018 model evaluation with 75% measurement completeness criterion. Some stations measure more than one species.**

**Table S7. Model performance statistics for daily maximum surface (a) PM<sub>2.5</sub>, (b) O<sub>3</sub>, and (c) NO<sub>2</sub> concentrations for June-August 2018 for three modelling systems and four geographic regions (shown in Figure 1). Units of  $\bar{O}$ ,  $\bar{M}$ , MB, and RMSE are  $\mu\text{g m}^{-3}$  for PM<sub>2.5</sub> and ppbv for O<sub>3</sub> and NO<sub>2</sub>.**

| (a) PM <sub>2.5</sub> | WCAN (81 stations, n=7369) |            |               | ECAN (98 stations, n=8870) |            |               | WUSA (198 stations, n=17852) |            |               | EUSA (319 stations, n=28664) |            |               |
|-----------------------|----------------------------|------------|---------------|----------------------------|------------|---------------|------------------------------|------------|---------------|------------------------------|------------|---------------|
|                       | RAQDPS                     | FW-<br>Ops | FW-<br>CFFEPS | RAQDPS                     | FW-<br>Ops | FW-<br>CFFEPS | RAQDPS                       | FW-<br>Ops | FW-<br>CFFEPS | RAQDPS                       | FW-<br>Ops | FW-<br>CFFEPS |
| $\bar{O}$             | 27                         |            |               | 14                         |            |               | 22                           |            |               | 17                           |            |               |
| $\bar{M}$             | 10                         | 30         | 21            | 13                         | 14         | 15            | 12                           | 26         | 25            | 16                           | 16         | 17            |
| MB                    | -16.9                      | 2.9        | -5.9          | 0.0                        | 0.2        | 1.3           | -10.1                        | 3.5        | 2.4           | -0.8                         | -1.0       | 0.2           |
| R                     | 0.16                       | 0.53       | 0.64          | 0.19                       | 0.27       | 0.32          | 0.10                         | 0.49       | 0.50          | 0.19                         | 0.20       | 0.20          |
| RMSE                  | 45                         | 78         | 35            | 13                         | 13         | 13            | 30                           | 56         | 47            | 13                           | 13         | 13            |

| (b) O <sub>3</sub> | WCAN (76 stations, n=6919) |            |               | ECAN (101 stations, n=9181) |            |               | WUSA (270 stations, n=24545) |            |               | EUSA (689 stations, n=62559) |            |               |
|--------------------|----------------------------|------------|---------------|-----------------------------|------------|---------------|------------------------------|------------|---------------|------------------------------|------------|---------------|
|                    | RAQDPS                     | FW-<br>Ops | FW-<br>CFFEPS | RAQDPS                      | FW-<br>Ops | FW-<br>CFFEPS | RAQDPS                       | FW-<br>Ops | FW-<br>CFFEPS | RAQDPS                       | FW-<br>Ops | FW-<br>CFFEPS |
| $\bar{O}$          | 41                         |            |               | 42                          |            |               | 61                           |            |               | 48                           |            |               |
| $\bar{M}$          | 42                         | 50         | 43            | 50                          | 50         | 50            | 72                           | 78         | 73            | 69                           | 69         | 70            |
| MB                 | 1                          | 9          | 3             | 8                           | 8          | 8             | 10                           | 17         | 12            | 21                           | 21         | 22            |
| R                  | 0.69                       | 0.45       | 0.68          | 0.73                        | 0.73       | 0.73          | 0.65                         | 0.53       | 0.65          | 0.65                         | 0.66       | 0.66          |
| RMSE               | 13                         | 29         | 14            | 15                          | 16         | 16            | 22                           | 34         | 23            | 27                           | 27         | 27            |

| (c) NO <sub>2</sub> | WCAN (77 stations, n=7035) |            |               | ECAN (71 stations, n=6467) |            |               | WUSA (74 stations, n=6743) |            |               | EUSA (74 stations, n=6652) |            |               |
|---------------------|----------------------------|------------|---------------|----------------------------|------------|---------------|----------------------------|------------|---------------|----------------------------|------------|---------------|
|                     | RAQDPS                     | FW-<br>Ops | FW-<br>CFFEPS |
| $\bar{O}$           | 11                         |            |               | 10                         |            |               | 14                         |            |               | 12                         |            |               |
| $\bar{M}$           | 16                         | 17         | 16            | 16                         | 16         | 16            | 29                         | 29         | 29            | 26                         | 26         | 26            |
| MB                  | 5                          | 6          | 5             | 6                          | 6          | 6             | 14                         | 15         | 15            | 14                         | 14         | 14            |
| R                   | 0.59                       | 0.59       | 0.60          | 0.62                       | 0.63       | 0.62          | 0.61                       | 0.60       | 0.61          | 0.66                       | 0.66       | 0.66          |
| RMSE                | 12                         | 13         | 12            | 13                         | 13         | 13            | 22                         | 23         | 22            | 21                         | 21         | 21            |

5

**Table S8. Categorical scores for June-August 2018 by geographic region for (a) PM<sub>2.5</sub> based on threshold of 30 µg m<sup>-3</sup>, (b) O<sub>3</sub> based on threshold of 65 ppbv, (c) NO<sub>2</sub> based on threshold of 30 ppbv**

| (a) PM <sub>2.5</sub> | WCAN  |        |            | ECAN          |        |            | WUSA          |        |            | EUSA          |        |            |
|-----------------------|-------|--------|------------|---------------|--------|------------|---------------|--------|------------|---------------|--------|------------|
|                       | Model | RAQDPS | FW-<br>Ops | FW-<br>CFFEPS | RAQDPS | FW-<br>Ops | FW-<br>CFFEPS | RAQDPS | FW-<br>Ops | FW-<br>CFFEPS | RAQDPS | FW-<br>Ops |
| POD                   | 2%    | 46%    | 42%        | 1%            | 2%     | 4%         | 3%            | 41%    | 44%        | 3%            | 2%     | 3%         |
| FAR                   | 76%   | 30%    | 26%        | 100%          | 99%    | 98%        | 85%           | 50%    | 49%        | 96%           | 96%    | 96%        |
| CSI                   | 1%    | 38%    | 37%        | 0%            | 1%     | 1%         | 2%            | 29%    | 31%        | 1%            | 1%     | 2%         |

| (a) O <sub>3</sub> | WCAN  |        |            | ECAN          |        |            | WUSA          |        |            | EUSA          |        |            |
|--------------------|-------|--------|------------|---------------|--------|------------|---------------|--------|------------|---------------|--------|------------|
|                    | Model | RAQDPS | FW-<br>Ops | FW-<br>CFFEPS | RAQDPS | FW-<br>Ops | FW-<br>CFFEPS | RAQDPS | FW-<br>Ops | FW-<br>CFFEPS | RAQDPS | FW-<br>Ops |
| POD                | 31%   | 48%    | 39%        | 72%           | 72%    | 73%        | 54%           | 62%    | 58%        | 81%           | 81%    | 81%        |
| FAR                | 82%   | 91%    | 82%        | 87%           | 87%    | 87%        | 51%           | 56%    | 52%        | 87%           | 87%    | 87%        |
| CSI                | 13%   | 8%     | 14%        | 12%           | 12%    | 12%        | 35%           | 35%    | 35%        | 13%           | 13%    | 13%        |

| (a) NO <sub>2</sub> | WCAN  |        |            | ECAN          |        |            | WUSA          |        |            | EUSA          |        |            |
|---------------------|-------|--------|------------|---------------|--------|------------|---------------|--------|------------|---------------|--------|------------|
|                     | Model | RAQDPS | FW-<br>Ops | FW-<br>CFFEPS | RAQDPS | FW-<br>Ops | FW-<br>CFFEPS | RAQDPS | FW-<br>Ops | FW-<br>CFFEPS | RAQDPS | FW-<br>Ops |
| POD                 | 41%   | 41%    | 42%        | 24%           | 25%    | 24%        | 76%           | 76%    | 76%        | 53%           | 54%    | 54%        |
| FAR                 | 95%   | 95%    | 95%        | 98%           | 98%    | 98%        | 93%           | 93%    | 93%        | 95%           | 95%    | 95%        |
| CSI                 | 5%    | 5%     | 5%         | 2%            | 2%     | 2%         | 6%            | 6%     | 6%         | 5%            | 5%     | 5%         |

5

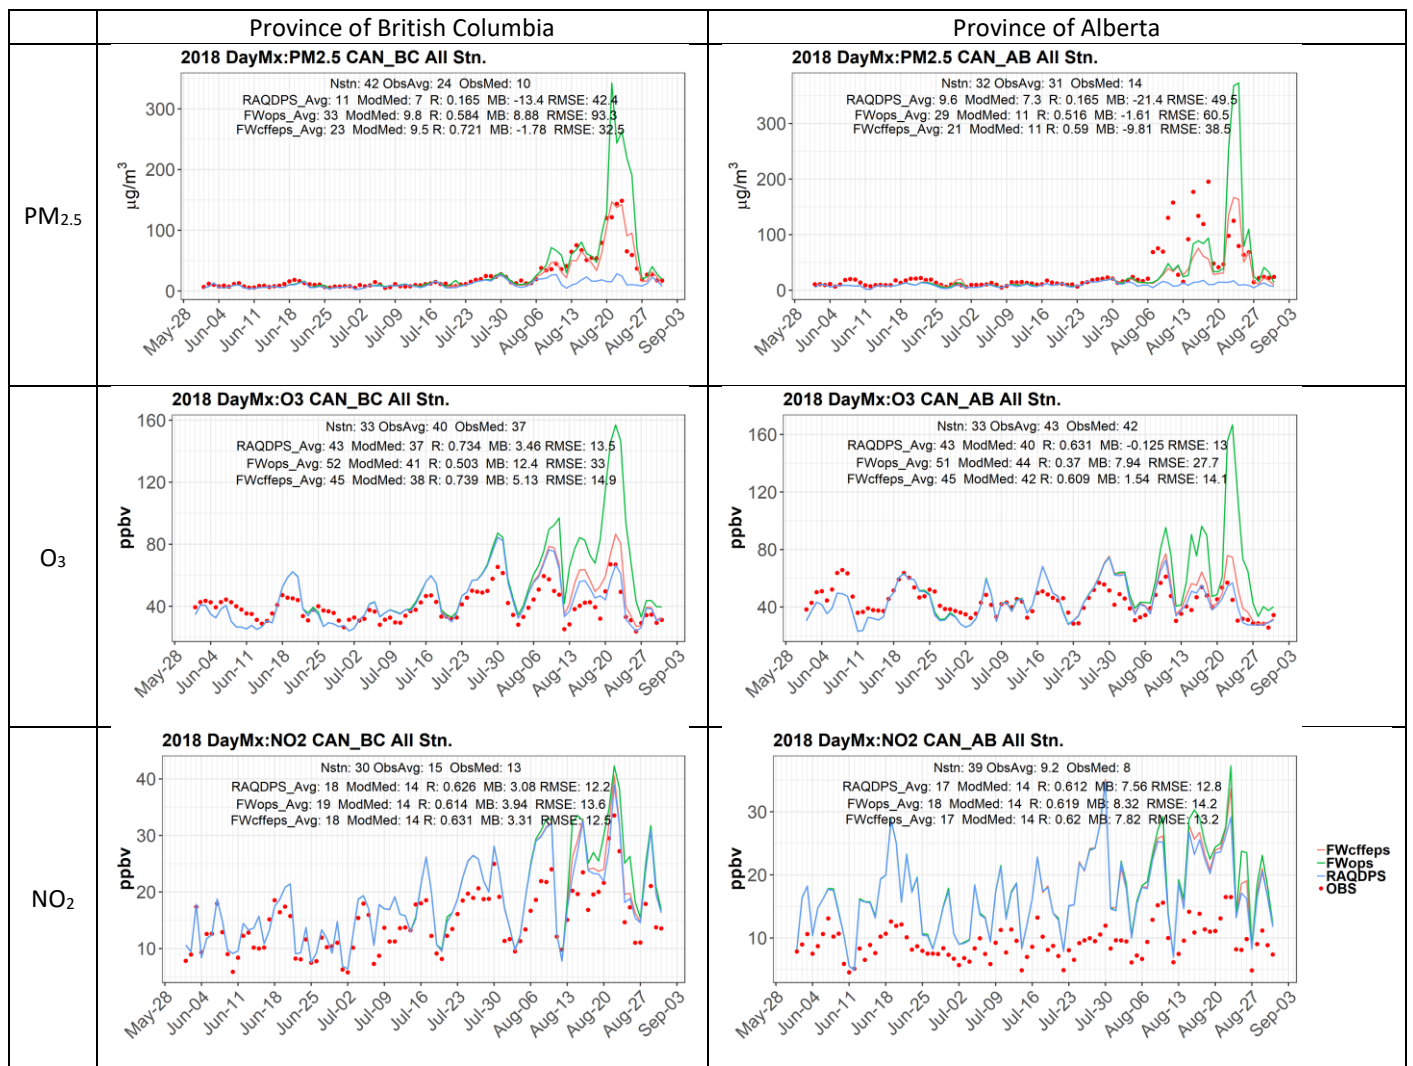

Figure S9. Time series of mean daily maximum PM<sub>2.5</sub>, O<sub>3</sub>, and NO<sub>2</sub> abundances for BC and Alberta in Canada from June–Aug. 2018 for forecasts by the RAQDPS (blue lines), FireWork-Ops (green lines), and FireWork-CFFEPS (red lines). The number of stations within each province and values of some model evaluation statistics for the three-month period are also listed within each panel, where Nstn is the number of measurement stations used in the calculation, ObsAvg and ObsMed are measurement average and median concentrations, respectively, RAQDPS\_Avg, FWops\_Avg, and FWcffepts\_Avg and the ModMed on the same line are average and median forecast concentrations from the RAQDPS, FireWork-Ops, and FireWork-CFFEPS systems, respectively, MB is mean bias, and RMSE is root mean square error.

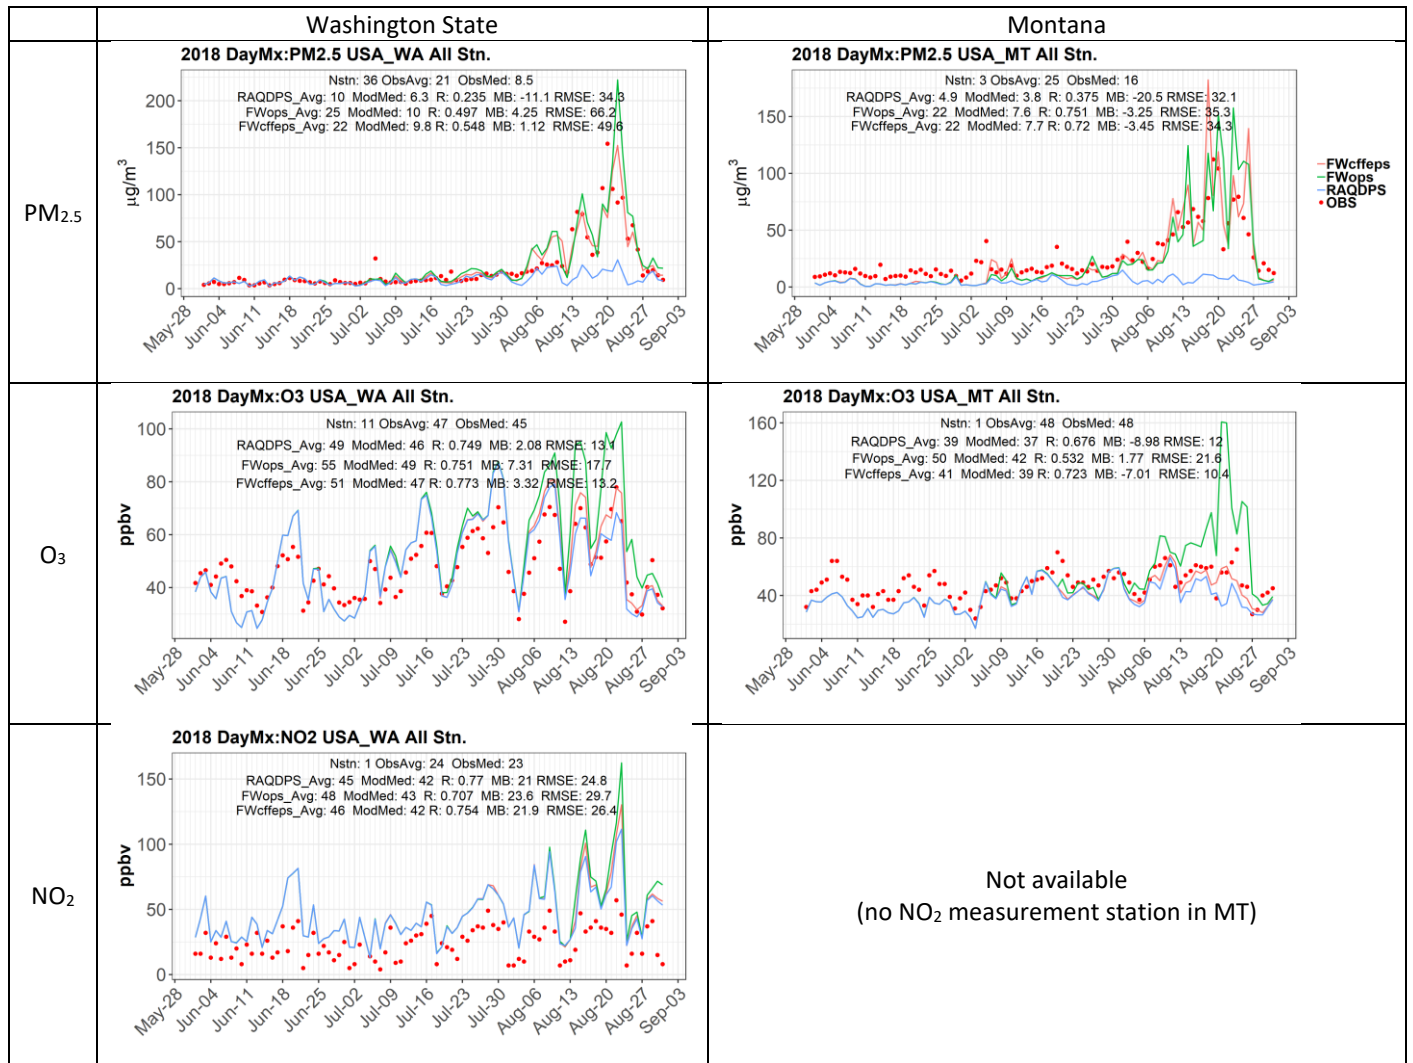

Figure S10. Same as Figure S9 but for WA and MT states in the U.S.



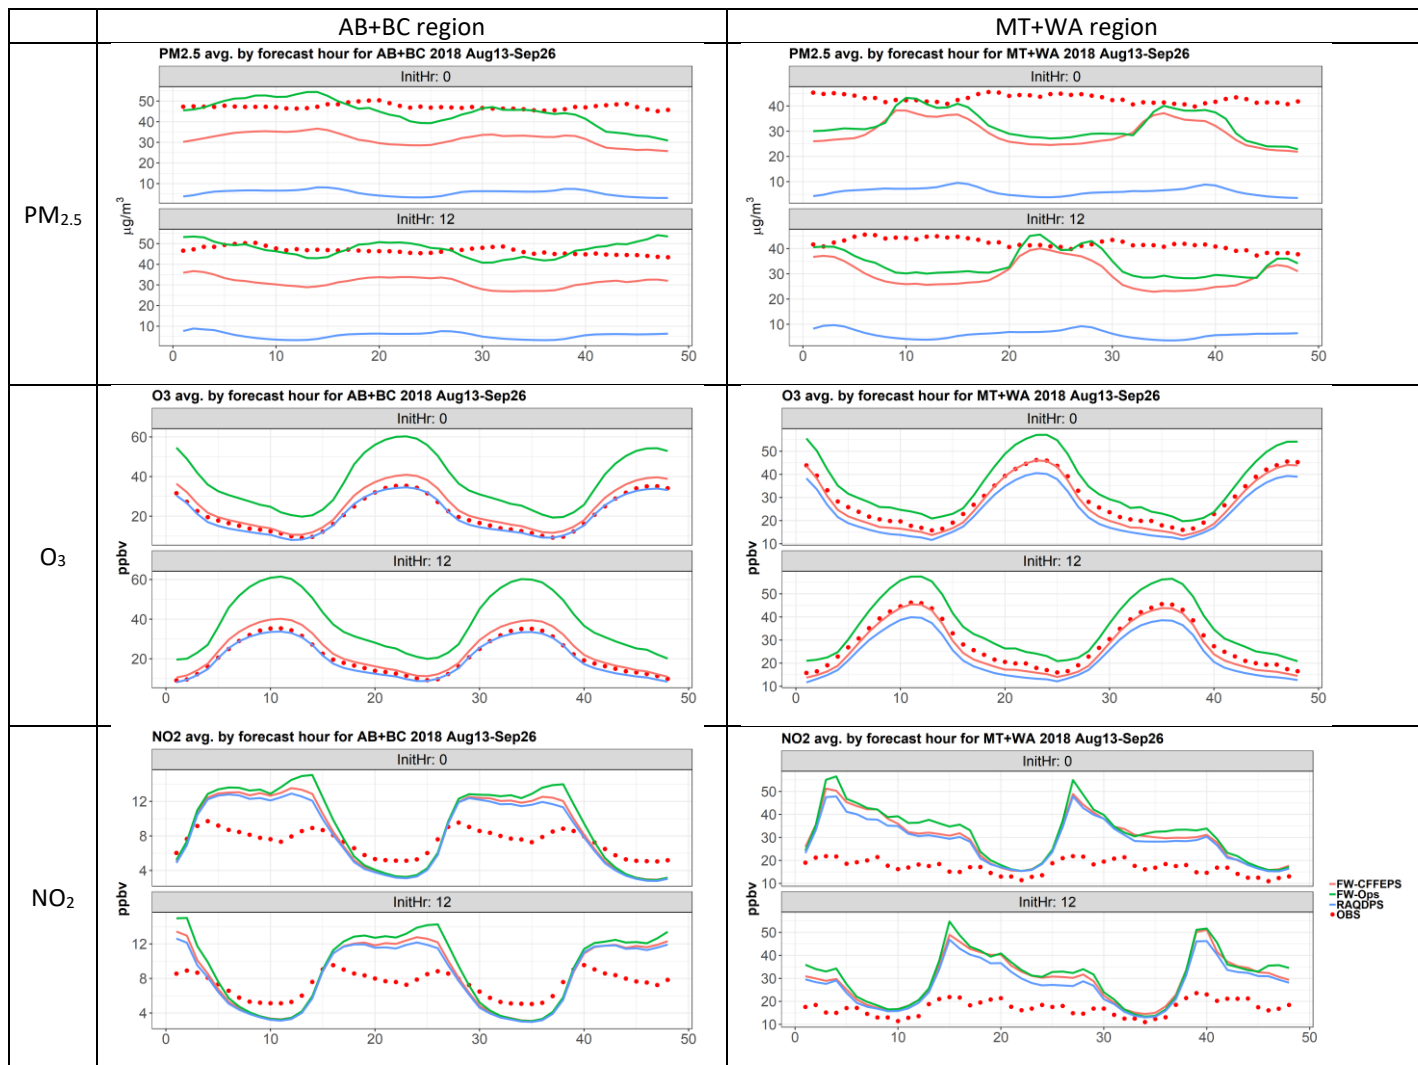

Figure S11. Mean PM<sub>2.5</sub> concentration (top), O<sub>3</sub> mixing ratio (middle) and NO<sub>2</sub> mixing ratio (bottom) by forecast hour (f00-f48) for the period from Aug. 13 to Aug. 26, 2018 for the three forecast models and surface measurements (OBS) for measurement stations in the AB+BC, and MT+WA regions. Note there is only one NO<sub>2</sub> measurement station in WA for the MT+WA region.



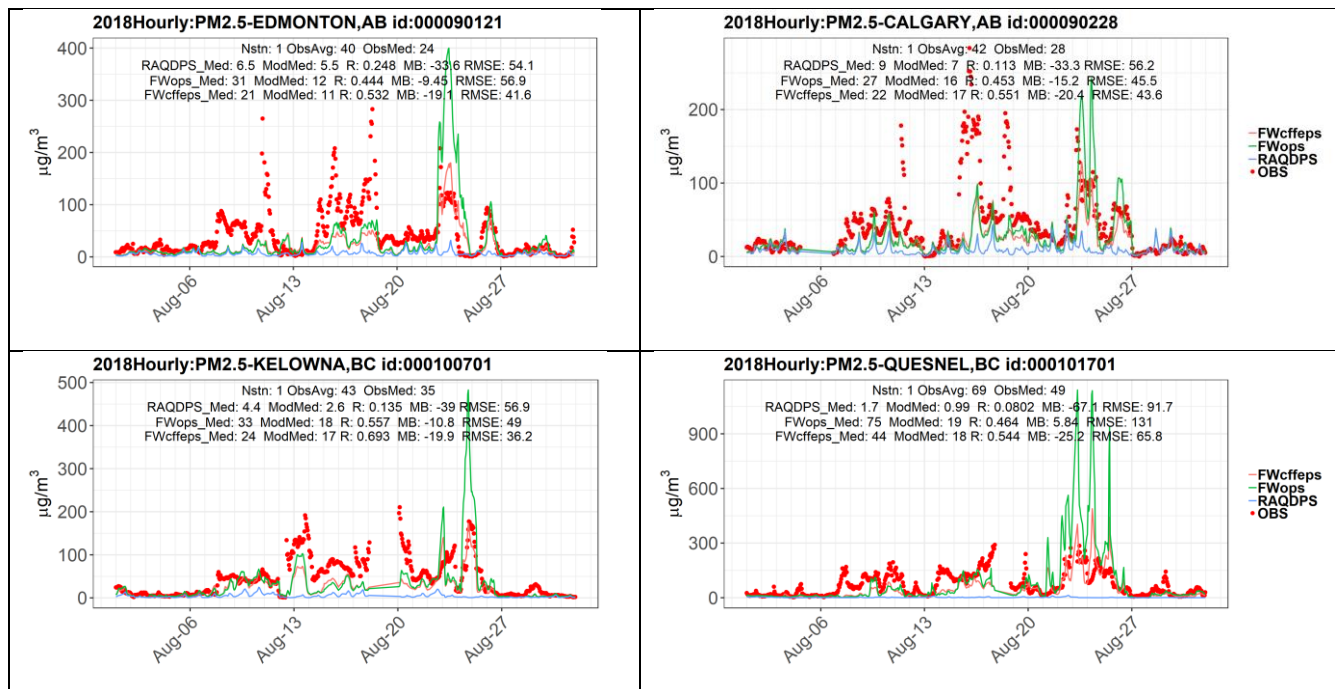

Figure S12. Hourly time series of PM<sub>2.5</sub> concentrations for Edmonton (lat./lon.: 53.54823/-113.3681), Calgary (lat./lon.: 51.04701/-114.0756) in AB, and Kelowna (lat./lon.: 49.86234/-119.4774), Quesnel (lat./lon.: 52.98169 / -122.4932) in BC for Aug. 1-31 2018 for forecasts by the RAQDPS (blue lines), FireWork-Ops (green lines), and FireWork-CFFEPS (red lines). Model evaluation statistics for the period are listed within each panel similar to Figure S9.

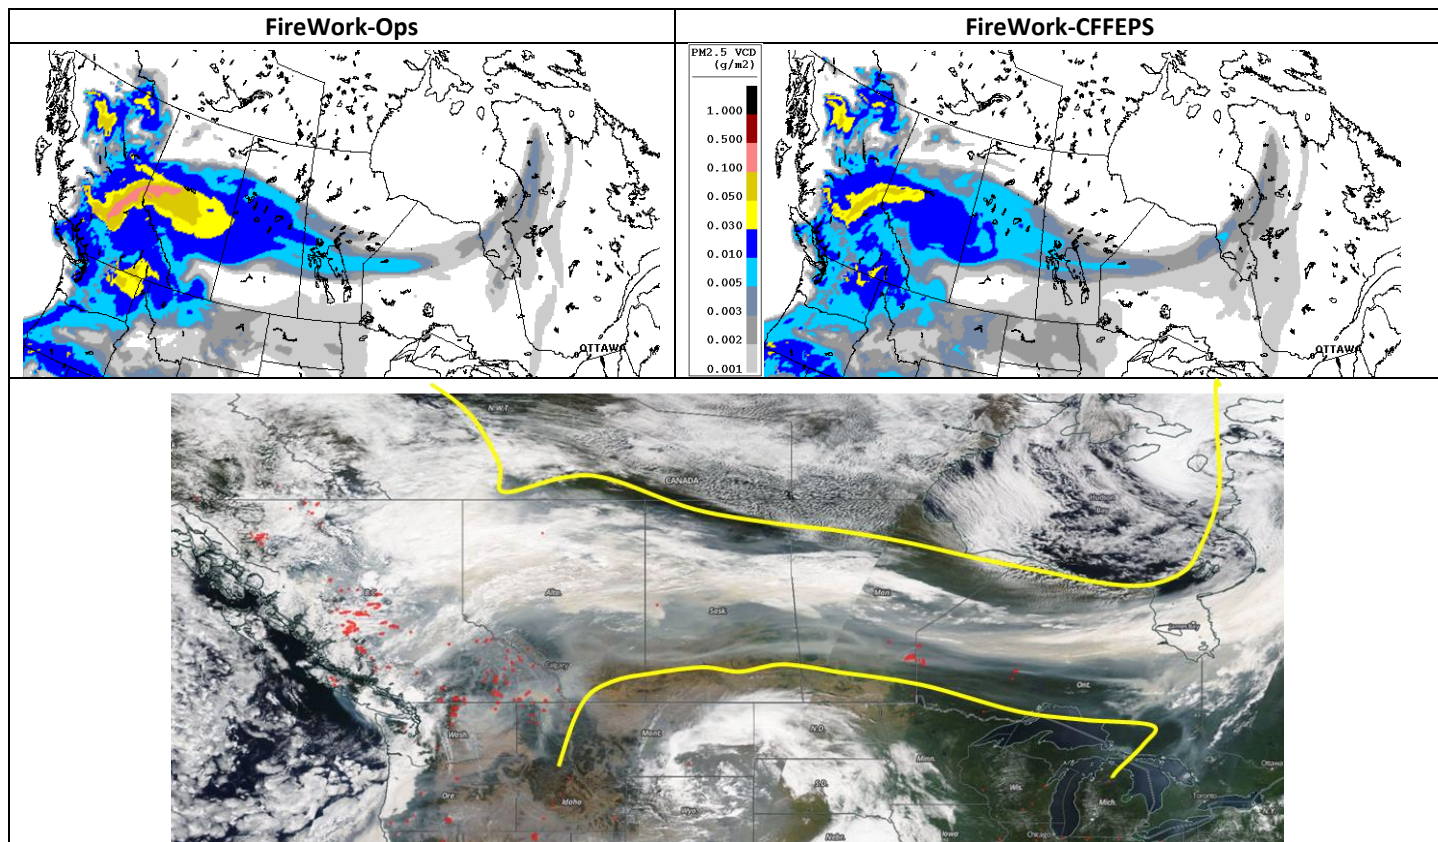

Figure S13. Fire-PM<sub>2.5</sub> VCD fields (g m<sup>-2</sup>) forecast by FireWork-Ops (top left) and FireWork-CFFEPS (top right) from the Aug. 22, 2018 12 UTC forecast run valid for August 23, 2018 12 UTC, and (bottom) VIIRS true colour satellite image for August 23, 2018 with yellow lines superimposed to aid comparison. Fire hotspots are represented as red dots. VIIRS image source: NASA <https://worldview.earthdata.nasa.gov>

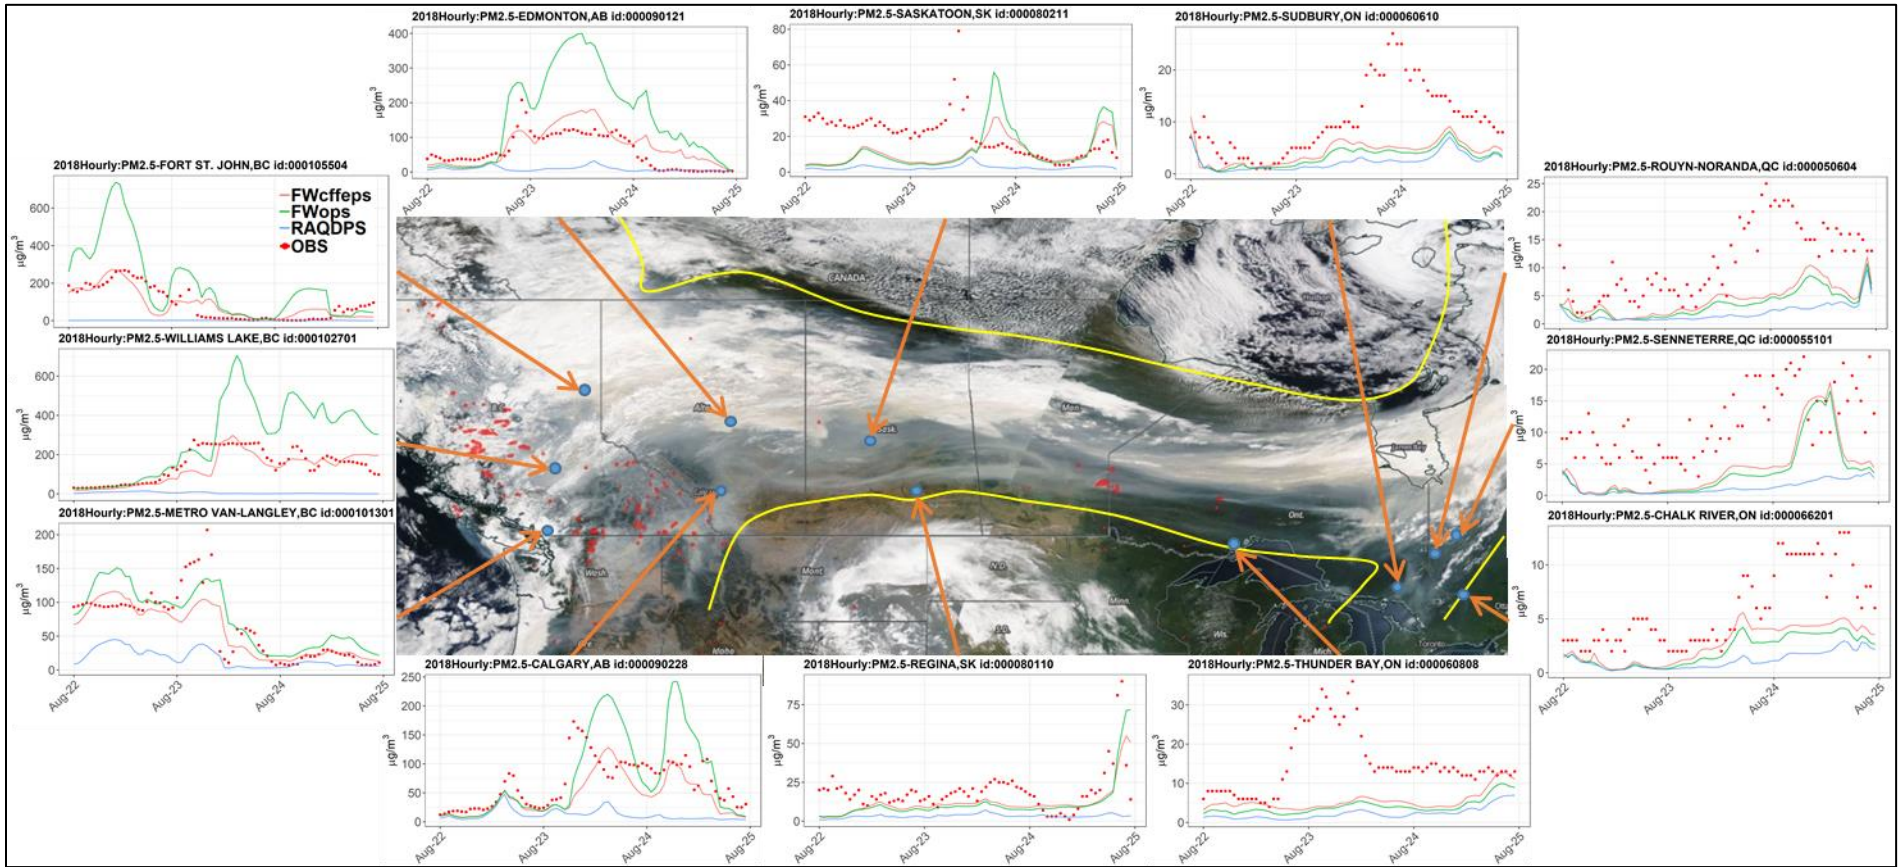

Figure S14. Time series of 2018 hourly surface PM<sub>2.5</sub> concentration from three model simulations and measurements (OBS) for selected stations for Aug. 22-25, 2018, and (centre) VIIRS true colour satellite image for August 23, 2018 with yellow lines superimposed to aid comparison. RAQDPS forecasts are shown with blue lines, FireWork-Ops forecasts with green lines, and FireWork-CFFEPS forecasts with red lines in the inset time series plots. Station locations are represented by blue dots and fire hotspots are represented in red dots superimposed on the satellite image. VIIRS image source: NASA <https://worldview.earthdata.nasa.gov>.

5
